# Supplementary material for: Advancements in Clay Materials for Trace Level Determination and Remediation of Phenols from Wastewater: A Review
Source: MDPI journal article supplement (doi:10.3390/separations10020125), 2023-02-10
Supplement: s1 [file s1]

**Table S1.** Chemical structures and physicochemical values of some phenols

| Compound            | Formula                                      | Structure                                                                           | Molecular weight (g/mol) | pKa   |
|---------------------|----------------------------------------------|-------------------------------------------------------------------------------------|--------------------------|-------|
| Phenol              | C <sub>6</sub> H <sub>6</sub> O              | 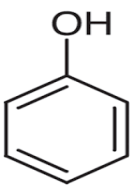   | 94.11                    | 10.0  |
| Cresol              | C <sub>7</sub> H <sub>8</sub> O              |    | 108.14                   | 10.28 |
| Resorcinol          | C <sub>6</sub> H <sub>6</sub> O <sub>2</sub> |    | 110.1                    | 19.15 |
| Hydroquinone        | C <sub>6</sub> H <sub>6</sub> O <sub>2</sub> |   | 110.11                   | 9.9   |
| Pyrogallol          | C <sub>6</sub> H <sub>6</sub> O <sub>3</sub> |  | 126.11                   | 9.03  |
| Naphthol            | C <sub>10</sub> H <sub>8</sub> O             |  | 144.17                   | 9.51  |
| Salicylic acid (SA) | C <sub>7</sub> H <sub>6</sub> O <sub>3</sub> |  | 178.23                   | 2.97  |

|                   |                   |                                                                                    |        |       |
|-------------------|-------------------|------------------------------------------------------------------------------------|--------|-------|
| Picric acid (PA)  | $C_6H_3N_3O_7$    | 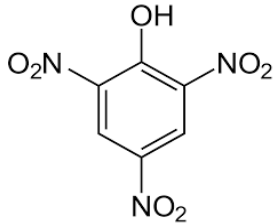  | 229.1  | 0.38  |
| Bisphenol A (BPA) | $C_{15}H_{16}O_2$ |   | 228.29 | 10.29 |
| Chlorophenol (CP) | $C_6H_5ClO$       |   | 128.6  | 9.12  |
| Nitrophenol (NP)  | $C_6H_5NO_3$      |  | 139.10 | 7.15  |

**Table S2.** Various Solid-Phase Extraction Techniques Reported on Determination of Phenols

| Clay                                       | Analyte                                                 | Mode of extraction | Sample                                  | Instrument | LOD (ug/L)    | LOQ (ug/L)  | Recovery (%) | Ref |
|--------------------------------------------|---------------------------------------------------------|--------------------|-----------------------------------------|------------|---------------|-------------|--------------|-----|
| 4-butylaniline-modified attapulgite        | BPA                                                     | SPE                | river                                   | HPLC       | 3.9           | 11.4        | 93 - 97      | [1] |
| polyethyleneimine-modified attapulgite     | <i>p</i> -CP<br>2,6-DCP<br>2,4,6-TCP                    | SPE                | river                                   | HPLC       | 0.08 - 0.56   | 0.27-1.88   | 84.4 - 96.8  | [2] |
| magnetic montmorillonite                   | BPA,                                                    | MSPE               | Sewage sludge                           | HPLC       | 5.1 - 8.6     | 16.9 – 29.2 | 84.3 - 98.2  | [3] |
| hydrophobic magnetic montmorillonite       | BPA                                                     | MSPE               | Well water<br>Wastewater<br>River water | HPLC-UV    | 0.15          | 0.35        | 95.3 - 98.2  | [4] |
| (OMMT-Fe <sub>3</sub> O <sub>4</sub> @PSF) | 4-CP<br>2-CP                                            | MSPE               | Natural water<br>wastewater             | HPLC-UV    | 0.17 - 0.22   | 1.07 – 1.52 | 90.9 - 115   | [5] |
| Montmorillonite/epoxy                      | 4-CP<br>2,4-DCP<br>2,4,6-TCP                            | MS-SBSE            | Well water<br>Wastewater                | HPLC-DAD   | 0.02 - 0.34   | 0.06-0.92   | 88.0 - 98.3  | [6] |
| polyaniline/montmorillonite                | 4-CP<br>2,4-DCP<br>2,6-DCP<br>2,4,6-TCP<br>3-NP<br>4-NP | SPME               | river                                   | GC-MS      | 0.005 - 0.014 | -           | -            | [7] |
| Polypyrrole–montmorillonite                | Phenol<br>4-CP<br>2,4-DCP<br>2,6-DCP<br>2,4,6-TCP       | SPME               | river                                   | GC-MS      | 0.02 - 0.05   | -           | 6.5 - 7.8    | [8] |
| Polyaniline-coated halloysite nanotubes    | 4-CP<br>2,4-DCP                                         | SPME               | river                                   | GC-MS      | 0.005 - 4     | -           | -            | [9] |

|                                                            |            |      |       |       |           |   |   |      |
|------------------------------------------------------------|------------|------|-------|-------|-----------|---|---|------|
| alumina wire with a<br>nanosized hydroxyapatite<br>coating | 2,6-DCP    | SPME | river | GC-MS | 0.5 - 1.2 | - | - | [10] |
|                                                            | 2,4,6-TCP  |      |       |       |           |   |   |      |
|                                                            | 3,4-NP     |      |       |       |           |   |   |      |
|                                                            | phenol     |      |       |       |           |   |   |      |
|                                                            | 4-CP       |      |       |       |           |   |   |      |
|                                                            | 2,4-DCP    |      |       |       |           |   |   |      |
|                                                            | 2,6-DCP    |      |       |       |           |   |   |      |
|                                                            | 2, 4,6-TCP |      |       |       |           |   |   |      |

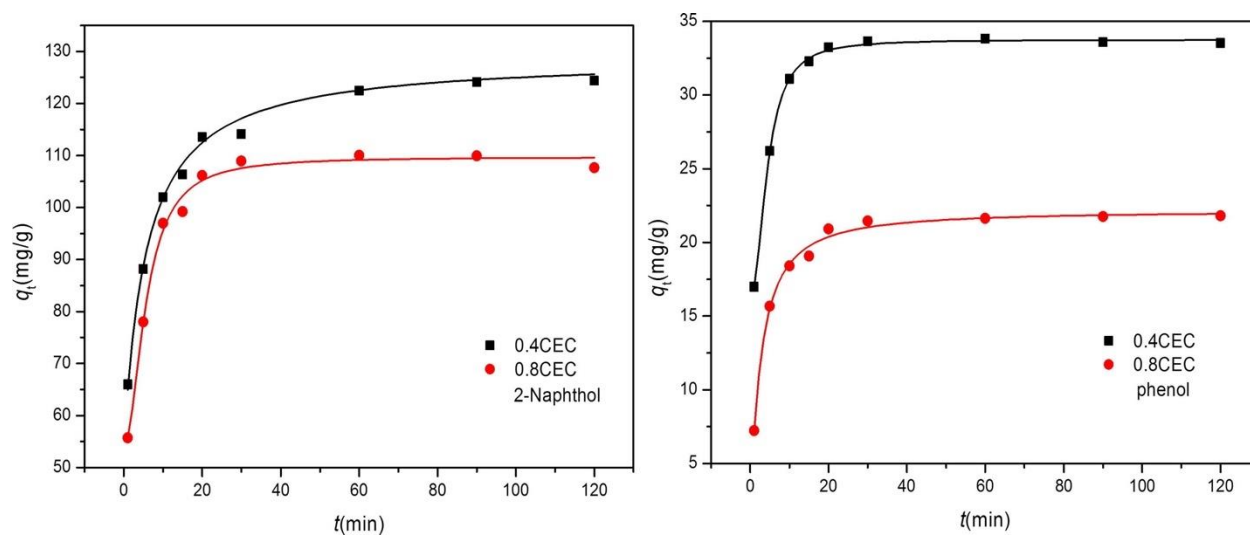

**Figure S1.** Effect of contact time for the adsorption of 2-naphthanol and phenol onto montmorillonite surfactant modified organoclay [11].

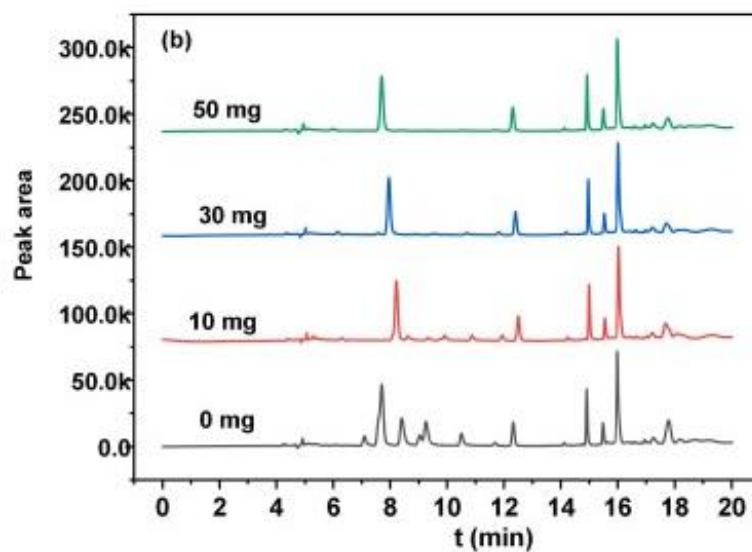

**Figure S2.** Effect of adsorbent dosage for the extraction of bisphenols onto  $\text{Fe}_3\text{O}_4$ /montmorillonite composite [3].

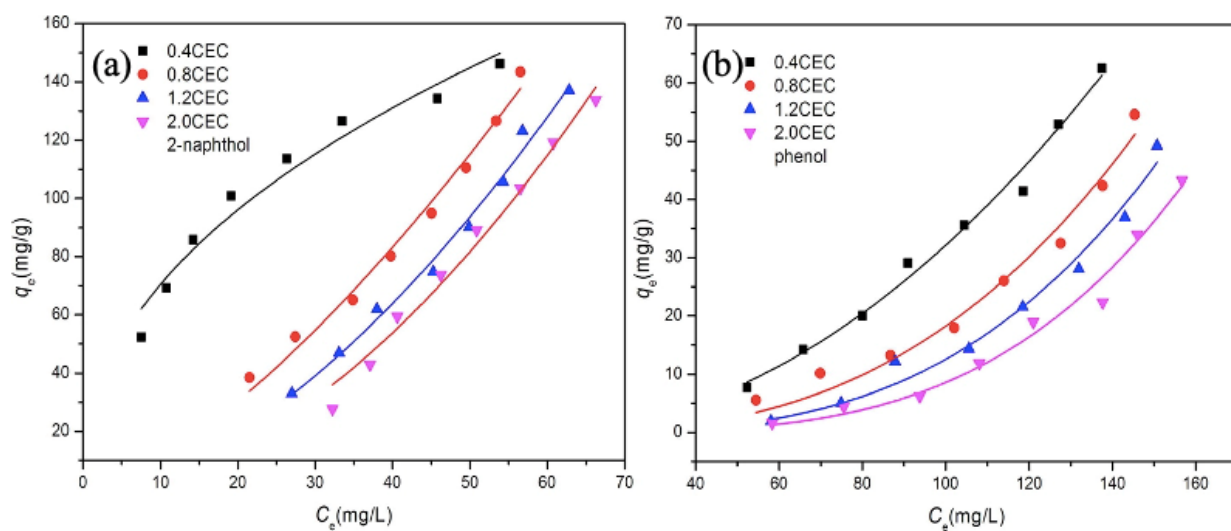

**Figure S3.** Adsorption of (a) 2-naphthol and (b) phenol onto organo-montmorillonite at different concentrations of the adsorbate [11].

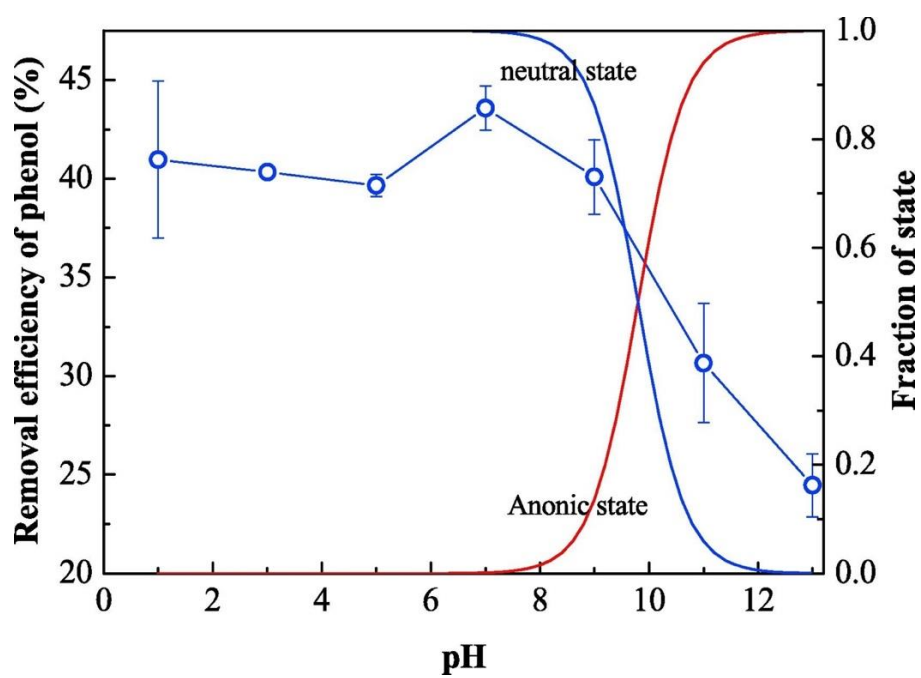

**Figure S4.** Effect of pH on the removal of phenol using surfactant modified montmorillonite [12].

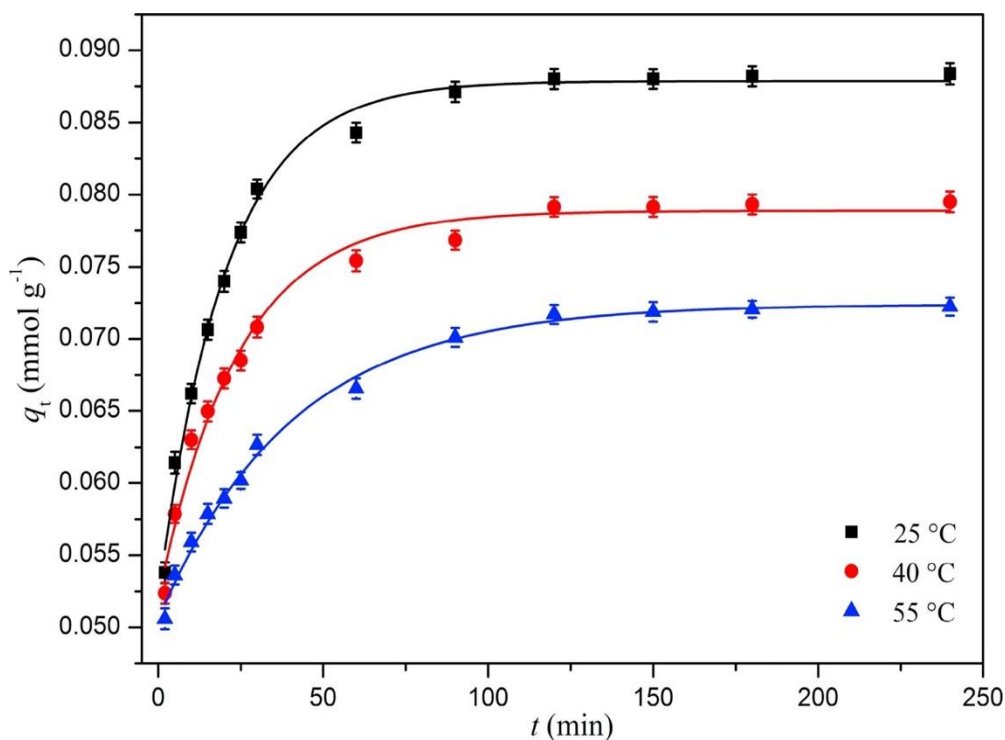

**Figure S5.** Effect of temperature changes for adsorption of phenol onto HMBP-montmorillonite [13].

## References

1. Chu, G.; Cai, W.; Shao, X. Preparation of 4-butylaniline-bonded attapulgite for pre-concentration of bisphenol A in trace quantity. *Talanta* **2015**, *136*, 29–34, doi:10.1016/j.talanta.2014.12.051.
2. Chai, M.; Chen, Y.; Xuan, R.; Ma, J.; Jin, Z.; Wang, T.; Qiu, D.; Zhang, L.; Zhang, Y. Application of polyethyleneimine-modified attapulgite for the solid-phase extraction of chlorophenols at trace levels in environmental water samples. *Anal. Bioanal. Chem.* **2018**, *410*, 6643–6651, doi:10.1007/s00216-018-1271-8.
3. Peng, G.; Lu, Y.; You, W.; Yin, Z.; Li, Y.; Gao, Y. Analysis of five bisphenol compounds in sewage sludge by dispersive solid-phase extraction with magnetic montmorillonite. *Microchem. J.* **2020**, *157*, 105040, doi:10.1016/j.microc.2020.105040.
4. Salehinia, S.; Ghoreishi, S.M.; Maya, F.; Cerdà, V. Hydrophobic magnetic montmorillonite composite material for the efficient adsorption and microextraction of

- bisphenol A from water samples. *J. Environ. Chem. Eng.* **2016**, *4*, 4062–4071, doi:10.1016/j.jece.2016.08.007.
5. Liu, X.; Yin, J.; Zhu, L.; Zhao, G.; Zhang, H. Evaluation of a magnetic polysulfone microcapsule containing organic modified montmorillonite as a novel solid-phase extraction sorbent with chlorophenols as model compounds. *Talanta* **2011**, *85*, 2451–2457, doi:10.1016/j.talanta.2011.07.106.
  6. Ghani, M.; Saraji, M.; Maya, F.; Cerdà, V. Automated multisyringe stir bar sorptive extraction using robust montmorillonite/epoxy-coated stir bars. *J. Chromatogr. A* **2016**, *1445*, 10–18, doi:10.1016/j.chroma.2016.03.081.
  7. Abolghasemi, M.M.; Parastari, S.; Yousefi, V. Microextraction of phenolic compounds using a fiber coated with a polyaniline-montmorillonite nanocomposite. *Microchim. Acta* **2015**, *182*, 273–280, doi:10.1007/s00604-014-1323-5.
  8. Abolghasemi, M.M.; Parastari, S.; Yousefi, V. Polypyrrole-montmorillonite nanocomposite as sorbent for solid-phase microextraction of phenolic compounds in water. *J. Sep. Sci.* **2014**, *37*, 3526–3532, doi:10.1002/jssc.201400602.
  9. Abolghasemi, M.M.; Arsalani, N.; Yousefi, V.; Arsalani, M.; Piryaee, M. Fabrication of polyaniline-coated halloysite nanotubes by in situ chemical polymerization as a solid-phase microextraction coating for the analysis of volatile organic compounds in aqueous solutions. *J. Sep. Sci.* **2016**, *39*, 956–963, doi:10.1002/jssc.201500839.
  10. Abolghasemi, M.M.; Parastari, S.; Yousefi, V. A nanoporous anodized alumina wire with a nanosized hydroxyapatite coating for headspace solid-phase microextraction of phenol and chlorophenols. *Microchim. Acta* **2016**, *183*, 241–247, doi:10.1007/s00604-015-1631-4.
  11. Yang, S.; Gao, M.; Luo, Z.; Yang, Q. The characterization of organo-montmorillonite modified with a novel aromatic-containing gemini surfactant and its comparative adsorption for 2-naphthol and phenol. *Chem. Eng. J.* **2015**, *268*, 125–134, doi:10.1016/j.cej.2015.01.060.
  12. Li, Y.; Hu, X.; Liu, X.; Zhang, Y.; Zhao, Q.; Ning, P.; Tian, S. Adsorption behavior of phenol by reversible surfactant-modified montmorillonite: Mechanism, thermodynamics, and regeneration. *Chem. Eng. J.* **2018**, *334*, 1214–1221, doi:10.1016/j.cej.2017.09.140.



13. Luo, Z.; Gao, M.; Yang, S.; Yang, Q. Adsorption of phenols on reduced-charge montmorillonites modified by bispyridinium dibromides: Mechanism, kinetics and thermodynamics studies. *Colloids Surfaces A Physicochem. Eng. Asp.* **2015**, *482*, 222–230, doi:10.1016/j.colsurfa.2015.05.014.
